# Supplementary material for: A cross-sectional survey of mental health clinicians’ knowledge, attitudes, and practice relating to tobacco dependence among young people with mental disorders
Source: Springer Nature journal article supplement (doi:10.1186/s12913-014-0618-x), 2014-11-25
Supplement: MOESM2 [file 9756820]

*Table1. Characteristics of survey respondents*

| Demographic details |                   |                                                        | Number of respondents (%) |
|---------------------|-------------------|--------------------------------------------------------|---------------------------|
| Professional group  | Non-medical staff | Nurses                                                 | 20 (33.3)                 |
|                     |                   | Occupational therapists                                | 2 (3.3)                   |
|                     |                   | Psychologists                                          | 6 (10.0)                  |
|                     |                   | Systemic therapists                                    | 5 (8.3)                   |
|                     |                   | Other therapist                                        | 9 (15.0)                  |
|                     |                   | Other health professional                              | 6 (10.0)                  |
|                     | Medical staff     | Consultant                                             | 9 (15.0)                  |
|                     |                   | Junior doctor                                          | 3 (5.0)                   |
|                     |                   | Adolescent in-patient                                  | 5 (8.3)                   |
|                     |                   | T3 Community CAMHS                                     | 26 (52.0)                 |
|                     |                   | Self-harm team                                         | 3 (5.0)                   |
|                     |                   | Paediatric Liaison team                                | 3 (5.0)                   |
|                     |                   | Early intervention psychosis and substance misuse team | 5 (8.3)                   |
|                     |                   | Looked after children                                  | 12 (20.0)                 |
|                     |                   | Neurodevelopmental team                                | 2 (3.3)                   |
|                     |                   | Intensive Interventions team                           | 4 (6.7)                   |
| Smoking status      |                   | Current smoker                                         | 4 (6.7)                   |
|                     |                   | Ex-smoker                                              | 17 (28.3)                 |
|                     |                   | Never smoker                                           | 39 (65.7)                 |
| Training attendance | Training          |                                                        | 25 (41.7)                 |
|                     | No Training       |                                                        | 35 (58.3)                 |
