# Supplementary material for: A cross-sectional survey of mental health clinicians’ knowledge, attitudes, and practice relating to tobacco dependence among young people with mental disorders
Source: Springer Nature journal article supplement (doi:10.1186/s12913-014-0618-x), 2014-11-25
Supplement: MOESM4 [file 9756820]

*Table 3. The influence of training on clinical practice and attitudes relating to addressing tobacco dependence among young people with mental illness*

| Statement                                                                                                        | Agreement (strongly agree/agree) (%) |                   |                       | Sig (2-sided) - $\chi^2$ ( <i>p</i> ) |
|------------------------------------------------------------------------------------------------------------------|--------------------------------------|-------------------|-----------------------|---------------------------------------|
|                                                                                                                  | All respondents                      | Training attended | Training not attended |                                       |
| I feel it lies within the remit of my responsibility as a mental health professional to address patients smoking | 51.6                                 | 64.0              | 48.8                  | $\chi^2=2.61$ , <i>p</i> =.088        |
| I routinely assess patients smoking status                                                                       | 62.7                                 | 62.5              | 62.8                  | $\chi^2=.001$ , <i>p</i> =.595        |
| I routinely ask patients about their motivation to quit smoking                                                  | 36.8                                 | 54.1              | 24.2                  | $\chi^2=5.34$ , <i>p</i> =.028*       |
| I routinely signpost/refer patients to local stop smoking services                                               | 29.8                                 | 50.0              | 15.1                  | $\chi^2=8.06$ , <i>p</i> =.008*       |
| Access to stop smoking medication and support are readily available in my clinic/on my ward                      | 22.4                                 | 16.6              | 26.4                  | $\chi^2=.778$ , <i>p</i> =.526        |
| Smoking is an important coping mechanism for patients.                                                           | 53.3                                 | 80.0              | 34.3                  | $\chi^2=12.24$ , <i>p</i> =.001*      |
| Patients stopping smoking while on my ward/in my clinic would not interfere with recovery                        | 81.3                                 | 75.0              | 85.7                  | $\chi^2=1.08$ , <i>p</i> =.328        |
| Addressing patients smoking would not have an adverse effect on the therapeutic relationship                     | 86.6                                 | 88.0              | 85.7                  | $\chi^2=.066$ , <i>p</i> =1.00        |

\*Denotes statistical significance at  $p < 0.05$
